# Supplementary material
Source: PubMed Central journal article supplement (PMC5087579)
Supplement: 10.7224_2015-038RR_Taylor_supplementary_material.pdf [file 10.7224_2015-038RR_Taylor_supplementary_material.pdf]

[Supplementary online-only material for Taylor PN, Wilkinson Hart IA, Khan MS, Slade-Sharman DEM: Correction of footdrop due to multiple sclerosis using the STIMuSTEP implanted dropped foot stimulator. *Int J MS Care*. 2016;18(5):239–247.]

**Supplementary Appendix 1. Questionnaire: Use of the STIMuSTEP**

[An equivalent questionnaire for the external FES device and electrodes was also used.]

Name: \_\_\_\_\_ Date: \_\_\_\_\_

Age: \_\_\_\_\_ Time since diagnosis: \_\_\_\_\_

Date of implantation: \_\_\_\_\_ Affected side: Right/Left

Unless otherwise indicated, please circle the appropriate answer.

1. On average, how often do you use the STIMuSTEP?  
Every day    4–6 days a week    2 or 3 days a week    Once a week  
Less than once a week
2. On the days that you use the STIMuSTEP, on average how long do you wear it?  
All day    9–12 hours    6–9 hours    3–6 hours    Less than 3 hours
3. At times when you do not use your STIMuSTEP, what means of correcting your dropped foot do you use?  
Nothing    AFO (splint)    Caliper    Aircast splint
4. During which activities do you use the STIMuSTEP?  
Every activity    Outdoors only    Indoors only  
Longer walks only    Only when tired    For specific activities
5. Please indicate for which activities you would use the STIMuSTEP.  
Walking in the house    Shopping    Social events  
Work    Exercising    Physiotherapy    Trips out / sight seeing  
Other (*Please specify*)  
\_\_\_\_\_

---

6. How far do you regularly walk with the STIMuSTEP?

Less than 10 yards    10–100 yards    100–500 yards

500 yards to 1 mile    More than 1 mile

7. What are your main reasons for using the STIMuSTEP?

Please **place a cross by any reasons** that apply to you and **circle the most important reason**.

I can walk further when using the STIMuSTEP.

I can walk faster when using the STIMuSTEP.

My walking takes less effort when using the STIMuSTEP.

I am less likely to trip and fall when using the STIMuSTEP.

I can walk on uneven ground when using the STIMuSTEP.

I feel more confident when using the STIMuSTEP.

I am more independent when using the STIMuSTEP.

Exercise with the STIMuSTEP keeps me fit.

I do not have to use an AFO splint or caliper when using the STIMuSTEP.

I do not have to use a walking stick, tripod, or walking frame when using the STIMuSTEP.

I do not need assistance to walk from a carer when using the STIMuSTEP.

My walking is better without the STIMuSTEP if I use the STIMuSTEP periodically.

Other please specify: \_\_\_\_\_

---

8. Do you need help to put the STIMuSTEP on each day?    Yes    No

9. How long does it take you to put on the equipment? \_\_\_\_\_ min
10. Have you felt any change in muscle stiffness (spasticity) since using the STIMuSTEP?

Increased                      No change                      Decreased

11. Which walking aid(s) did you use **before** using the STIMuSTEP?

Walking stick/tripod                      Wheelchair      Walking frame                      Crutches

AFO splint/Caliper                      Assistance of one person

Which walking aid/s do you use **since** using the STIMuSTEP?

Walking stick/tripod                      Wheelchair      Walking frame                      Crutches

AFO splint/Caliper                      Assistance of one person

12. Since using the STIMuSTEP has there been any change in the amount you use any of the walking aids you circled in question 11?

Walking aid (*please specify*)

..... increased                      no change                      decreased

..... increased                      no change                      decreased

..... increased                      no change                      decreased

13. Does the STIMuSTEP work at the correct time when you are walking?

Always                      Most of the time                      Sometimes                      Rarely                      Never

14. Does the STIMuSTEP ever work at inappropriate times (eg, while sitting)?

Never                      Rarely                      Sometimes                      Often                      Always

15. Do you adjust the STIMuSTEP settings yourself?

Always                      Usually                      Sometimes                      Occasionally                      Never

16. How often do the STIMuSTEP control settings require adjustment?

Every few minutes                      Every hour                      Every few hours  
Occasionally                      Only when I put it on

17. How easy is it for **you** to adjust the settings?

Very easy                      Easy                      Fairly easy                      Fairly difficult  
Difficult                      Very difficult

If you experience difficulty in adjusting the controls, please explain why. \_\_\_\_\_  
\_\_\_\_\_

18. Do you agree with the following statements? Please circle the appropriate answer.

**(a) I am glad that I have the STIMuSTEP**

Strongly agree                      Agree                      Indifferent                      Disagree                      Strongly disagree

**(b) I would recommend STIMuSTEP to another person**

Strongly agree                      Agree                      Indifferent                      Disagree                      Strongly disagree

**(c) I feel more confident when I use STIMuSTEP**

Strongly agree                      Agree                      Indifferent                      Disagree                      Strongly disagree

**(d) I am more independent since I received the STIMuSTEP**

Strongly agree                      Agree                      Indifferent                      Disagree                      Strongly disagree

**(e) STIMuSTEP has improved my quality of life**

Strongly agree                      Agree                      Indifferent                      Disagree                      Strongly disagree

**(f) STIMuSTEP has a good cosmetic appearance when worn**

Strongly agree      Agree      Indifferent      Disagree      Strongly disagree

**(g) The sensation from the implanted electrodes is comfortable**

Strongly agree      Agree      Indifferent      Disagree      Strongly disagree



Very slowly   Not at all

Thank you for taking the time to complete this questionnaire. Please add any further comments you may have below.
